# Supplementary material
Source: Springer Nature journal article supplement (https://www.springermedizin.de/resource/supplementary/12933_2008_150_MOESM1_ESM.pdf/9539706)

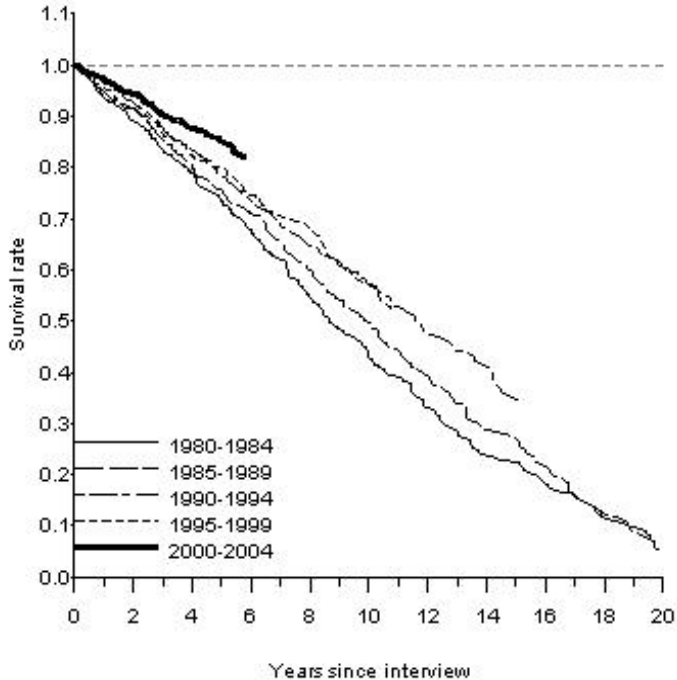

Supplement: MOESM1 [file 9539706]
